# Supplementary material for: Colorimetric sensor strips for formaldehyde assay utilizing fluoral-p decorated polyacrylonitrile nanofibrous membranes
Source: Royal Society of Chemistry journal article supplement (doi:10.1039/c3an00812f), 2013-01-01
Supplement: c3an00812f.pdf [file c3an00812f.pdf]

Electronic Supplementary Information

**Colorimetric sensor strips for formaldehyde assay utilizing fluoral-p  
decorated polyacrylonitrile nanofibrous membranes**

Xueqin Wang,<sup>a, b</sup> Yang Si,<sup>a</sup> Xue Mao,<sup>a</sup> Yan Li,<sup>c</sup> Jianyong Yu,<sup>c</sup> Huaping Wang<sup>a</sup> and

Bin Ding<sup>\*a, b, c</sup>

<sup>a</sup> *State Key Laboratory for Modification of Chemical Fibers and Polymer Materials, College of Materials Science and Engineering, Donghua University, Shanghai 201620, China*

<sup>b</sup> *State Environmental Protection Engineering Center for Pollution Treatment and Control in Textile Industry, Donghua University, Shanghai 201620, China*

<sup>c</sup> *Nanomaterials Research Center, Modern Textile Institute, Donghua University, Shanghai 200051, China*

**Fig. S1**

The fractal dimension ( $D$ ) was calculated by two steps, first, calculating the  $V_{mono}$  based on the BET theory (equation 1),

$$\frac{1}{V[(P_0/P)-1]} = \frac{c-1}{cV_{mono}} \left(\frac{P}{P_0}\right) + \frac{1}{cV_{mono}} \quad (1)$$

Where,  $V$  is the amount of  $N_2$  adsorbed at each equilibrium pressure,  $P_0$  is the saturation pressure  $V_{mono}$  is the amount adsorbed of monolayer coverage, and  $c$  is the constant. When temperature is constant, the plot of the  $1/V[(P/P_0)-1]$  against  $P/P_0$  reconstructed from the  $N_2$  absorption isotherm should be a straight line, but in fact, only when  $P/P_0$  is in the range of 0.05 to 0.35, the figure displayed a good linearity. Thus we could calculate the slope ( $k$ ) and intercept ( $b$ ) from the figure, and then calculate the  $V_{mono}$  based on the following equations (2 and 3).

$$V_{mono} = \frac{1}{k+1} \quad (2)$$

$$c = 1 + \frac{k}{b} \quad (3)$$

Then, the calculation of  $D$  was according to the modified FHH theory of multilayer gas adsorption:

$$\ln(V/V_{mono}) = S[\ln(\ln(p_0/p))] + \text{constant} \quad (4)$$

A plot of  $\ln(V/V_{mono})$  versus  $\ln(\ln(P_0/P))$  shows a linear trend, and the slope  $S$  could be used to calculate  $D$  utilizing the expression:  $S = D-3$ , which was according to the dominant forces of liquid-gas surface tension at high coverage.

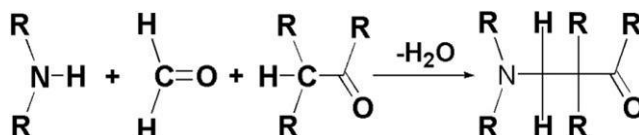

**Fig. S2** The mechanism of Mannich reaction.

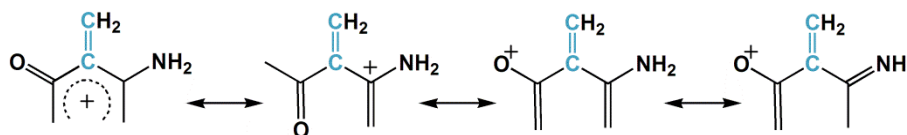

**Fig. S3** The resonance states of intermediates 2

**Table S1** The sensitivity comparison of colorimetric strips and filter paper

|               | Control      |             |             |             | 60 ppb       |             |             |             | $\Delta R_{417}$ | $\Delta E^*$ |
|---------------|--------------|-------------|-------------|-------------|--------------|-------------|-------------|-------------|------------------|--------------|
|               | $R_{417}$    | $L^*$       | $a^*$       | $b^*$       | $R_{417}$    | $L^*$       | $a^*$       | $b^*$       |                  |              |
| <b>Strips</b> | <b>0.841</b> | <b>96.2</b> | <b>-8.1</b> | <b>-2.3</b> | <b>0.694</b> | <b>92.4</b> | <b>-8.4</b> | <b>-0.1</b> | <b>0.147</b>     | <b>4.31</b>  |
| <b>Paper</b>  | <b>0.836</b> | <b>95.6</b> | <b>-8.0</b> | <b>-1.6</b> | <b>0.756</b> | <b>93.7</b> | <b>-8.6</b> | <b>-0.4</b> | <b>0.080</b>     | <b>2.32</b>  |
